# Supplementary material
Source: publisher site journal article supplement (https://www.dovepress.com/article/479123)
Supplement: Supplementary file 1 [file get_supplementary_file.php]

Figure S1 Growth curves for the distant tumors on mice after various treatments indicated.


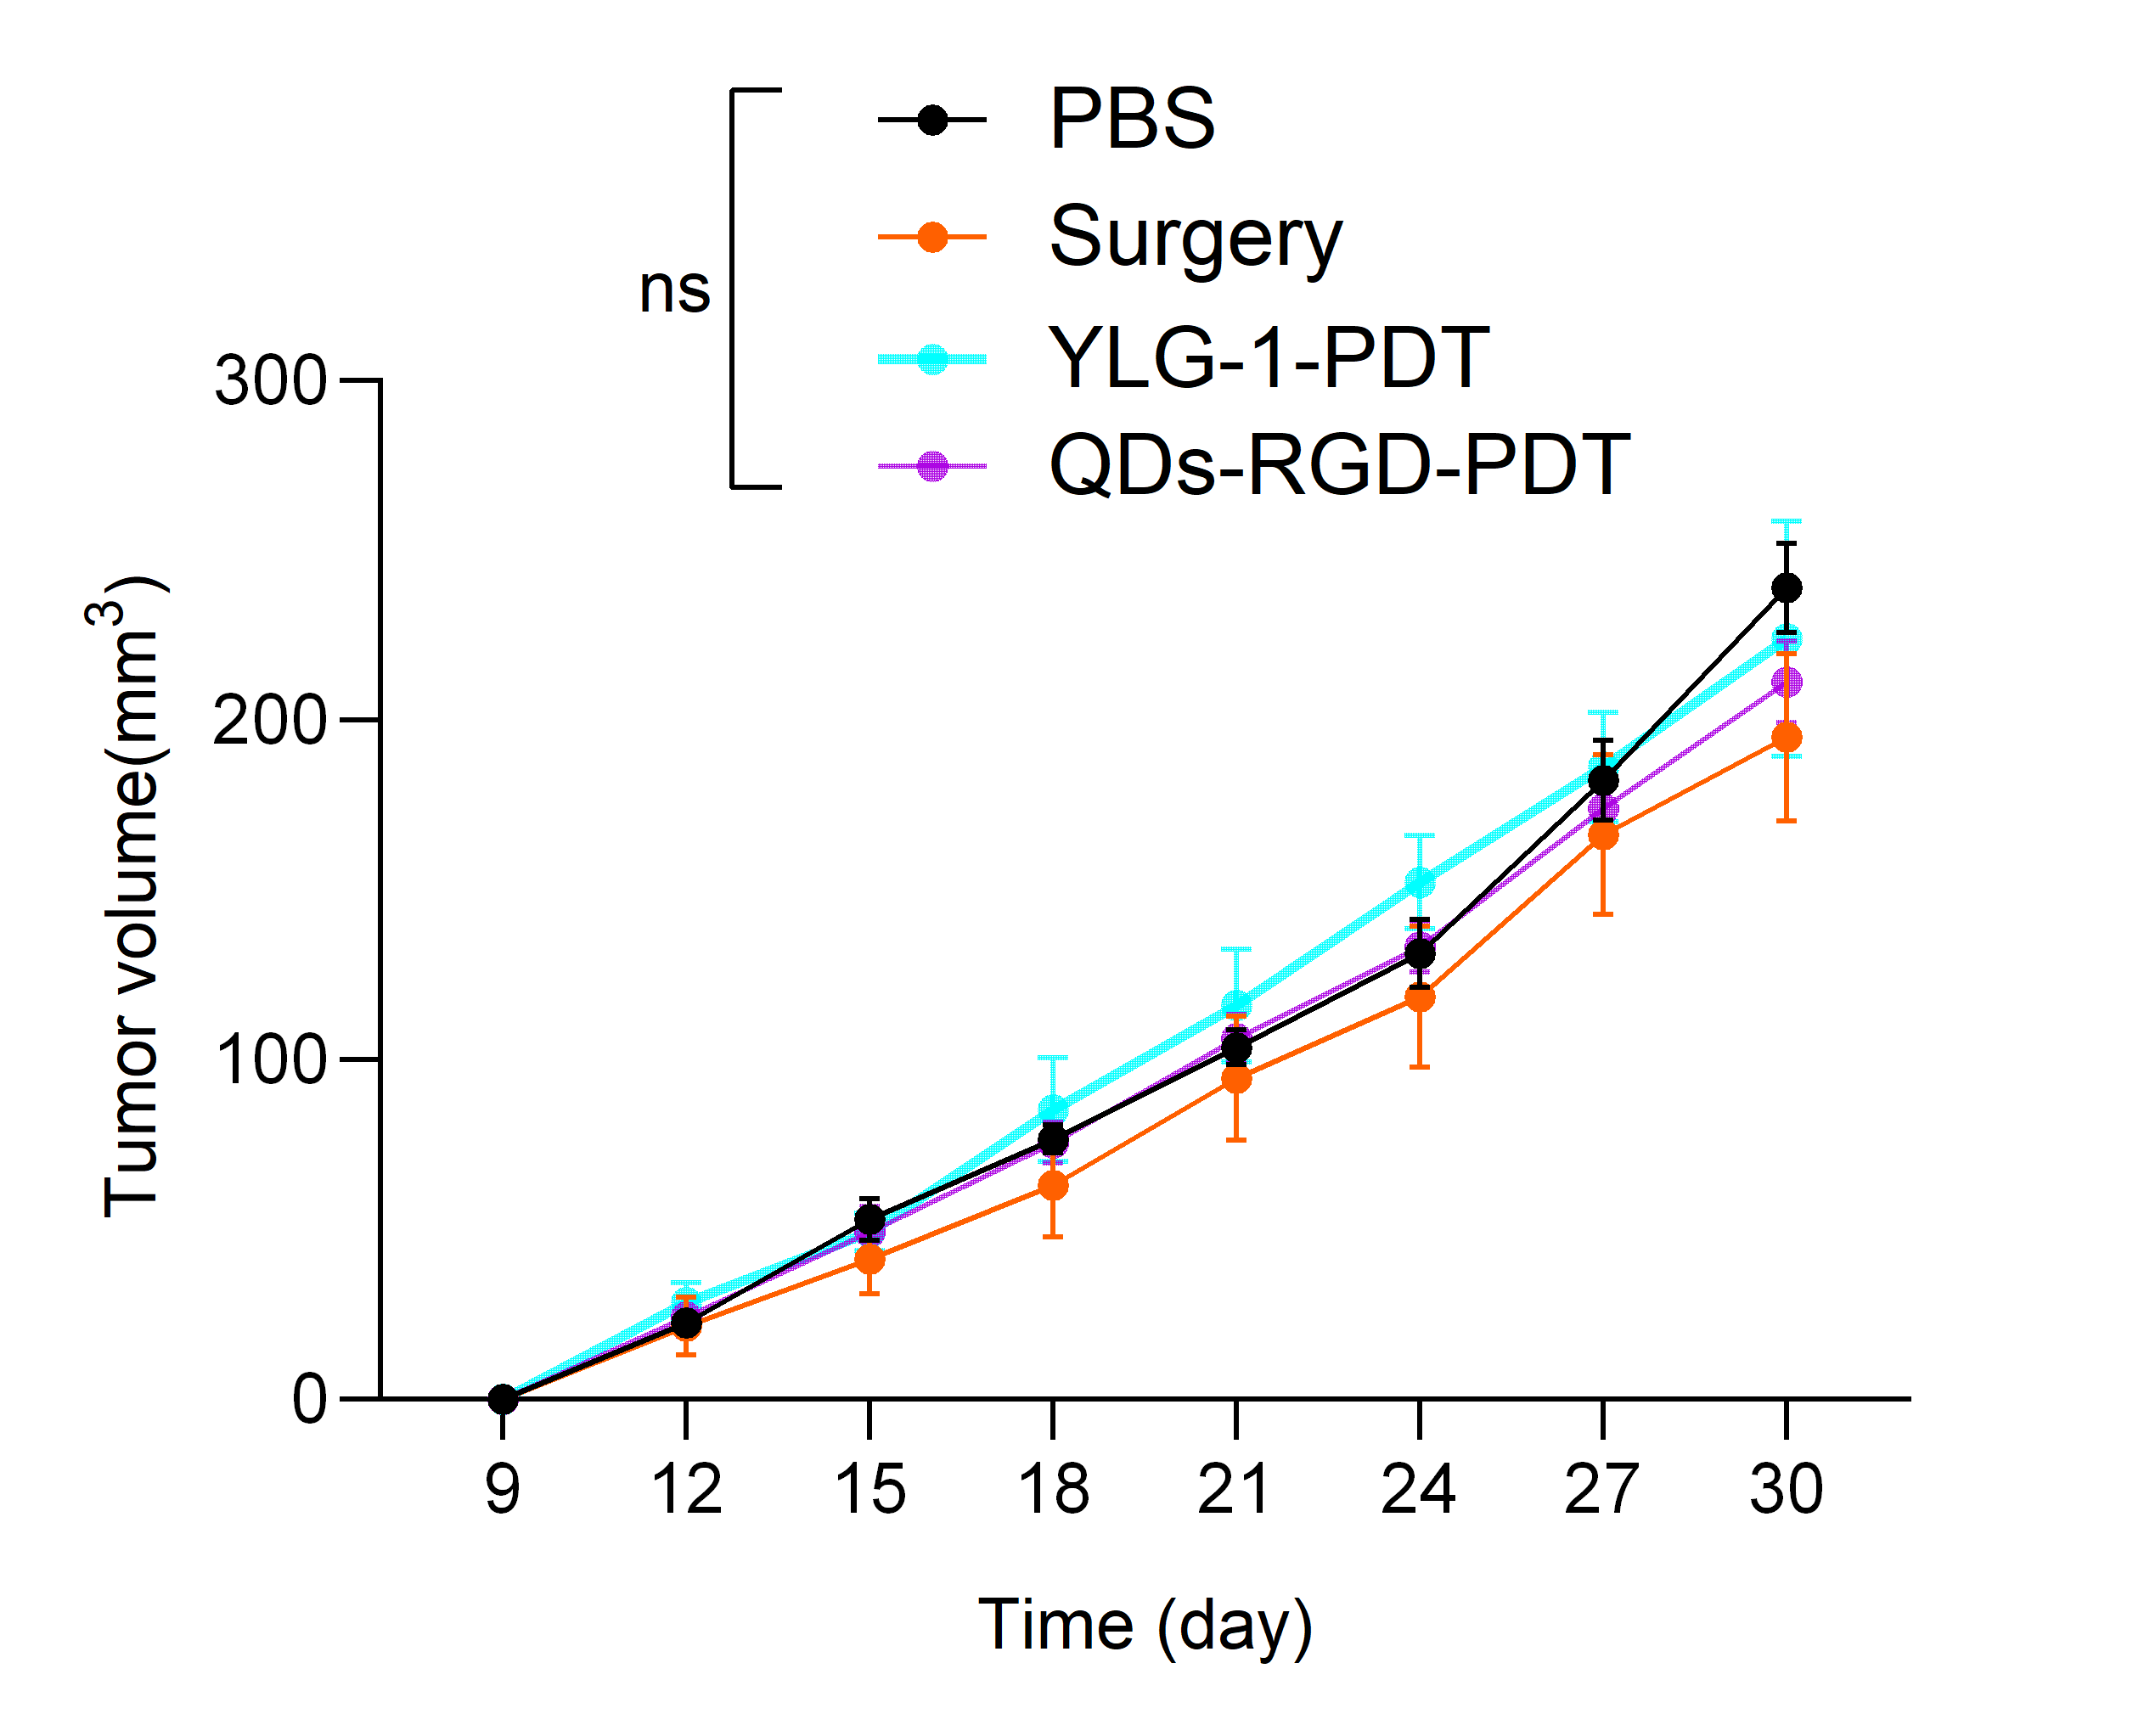


Notes: Growth curves for the distant tumors on mice after various treatments indicated (n = 5 per group). Data are expressed as means ± SEM (n = 5). ns, not significant.

Abbreviations: QDs-RGD, quantum dots conjugated with arginine-glycine-aspartic acid peptide sequence; YLG-1, (17R,18R)-2-(1-hexyloxyethyl)-2-devinyl chlorine E6 trisodium salt; PBS, phosphate-buffered saline; PDT, photodynamic therapy; SEM, standard error of the mean.

Figure S2 Individual tumor growth curves during the treatment.


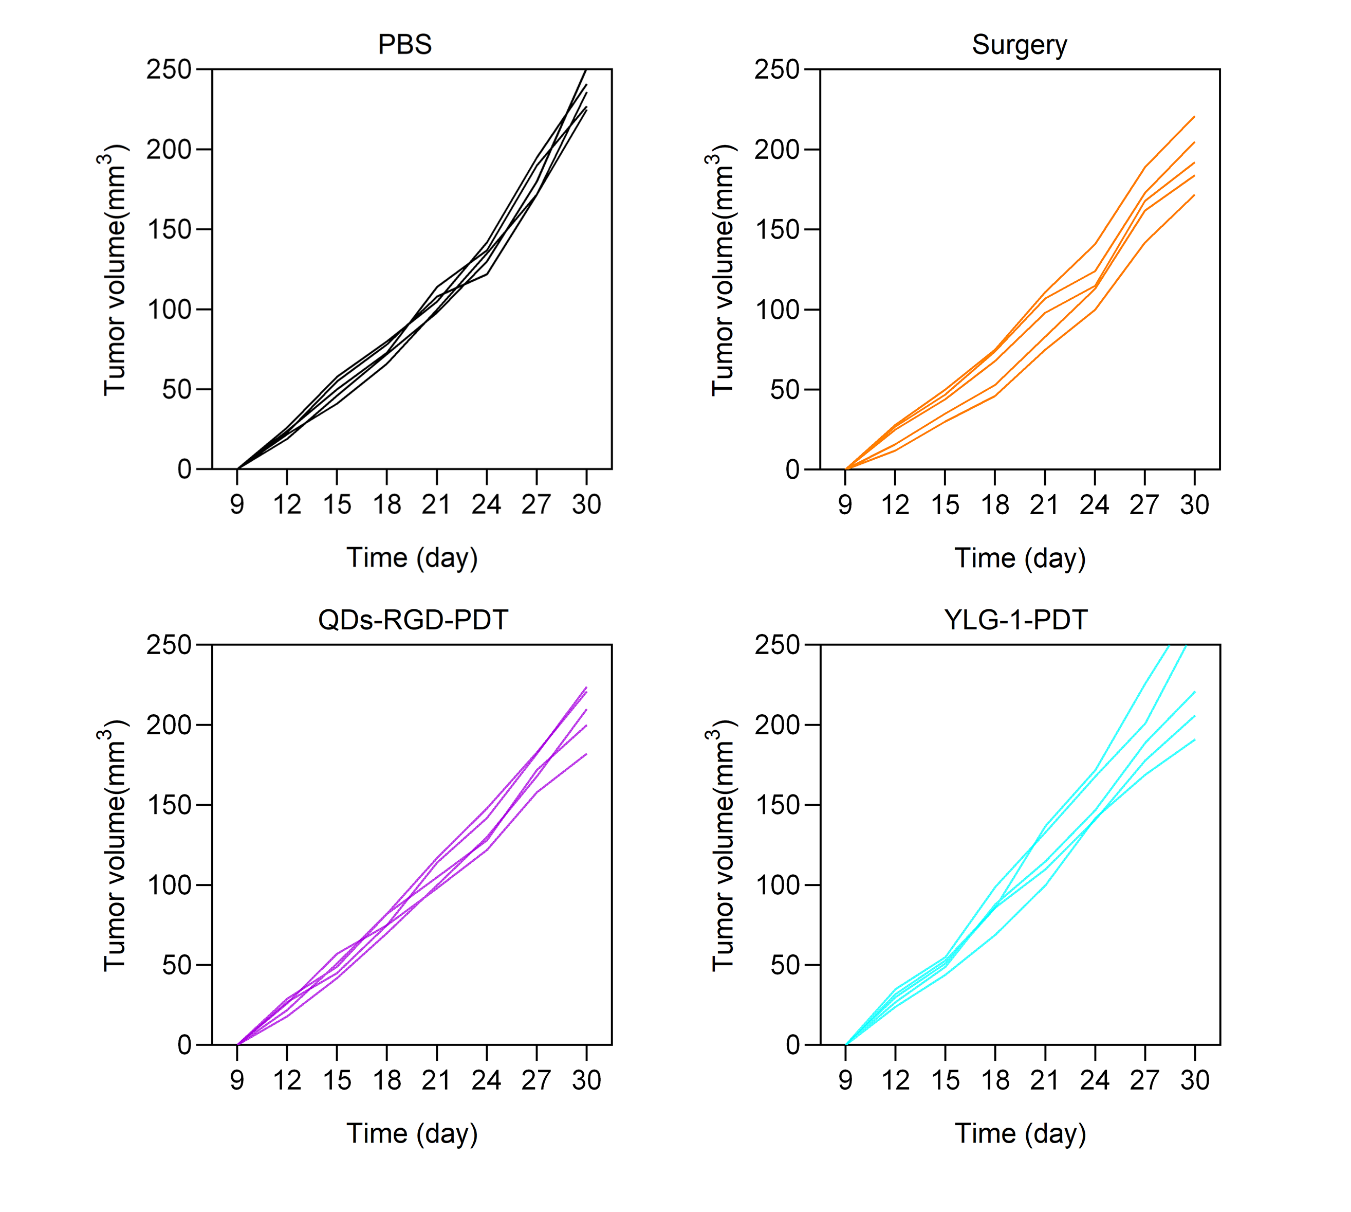


Notes: Individual tumor growth curves during the treatment.

Abbreviations: QDs-RGD, quantum dots conjugated with arginine-glycine-aspartic acid peptide sequence; YLG-1, (17R,18R)-2-(1-hexyloxyethyl)-2-devinyl chlorine E6 trisodium salt; PBS, phosphate-buffered saline; PDT, photodynamic therapy.

Figure S3 Survival rate on mice after various treatments indicated.


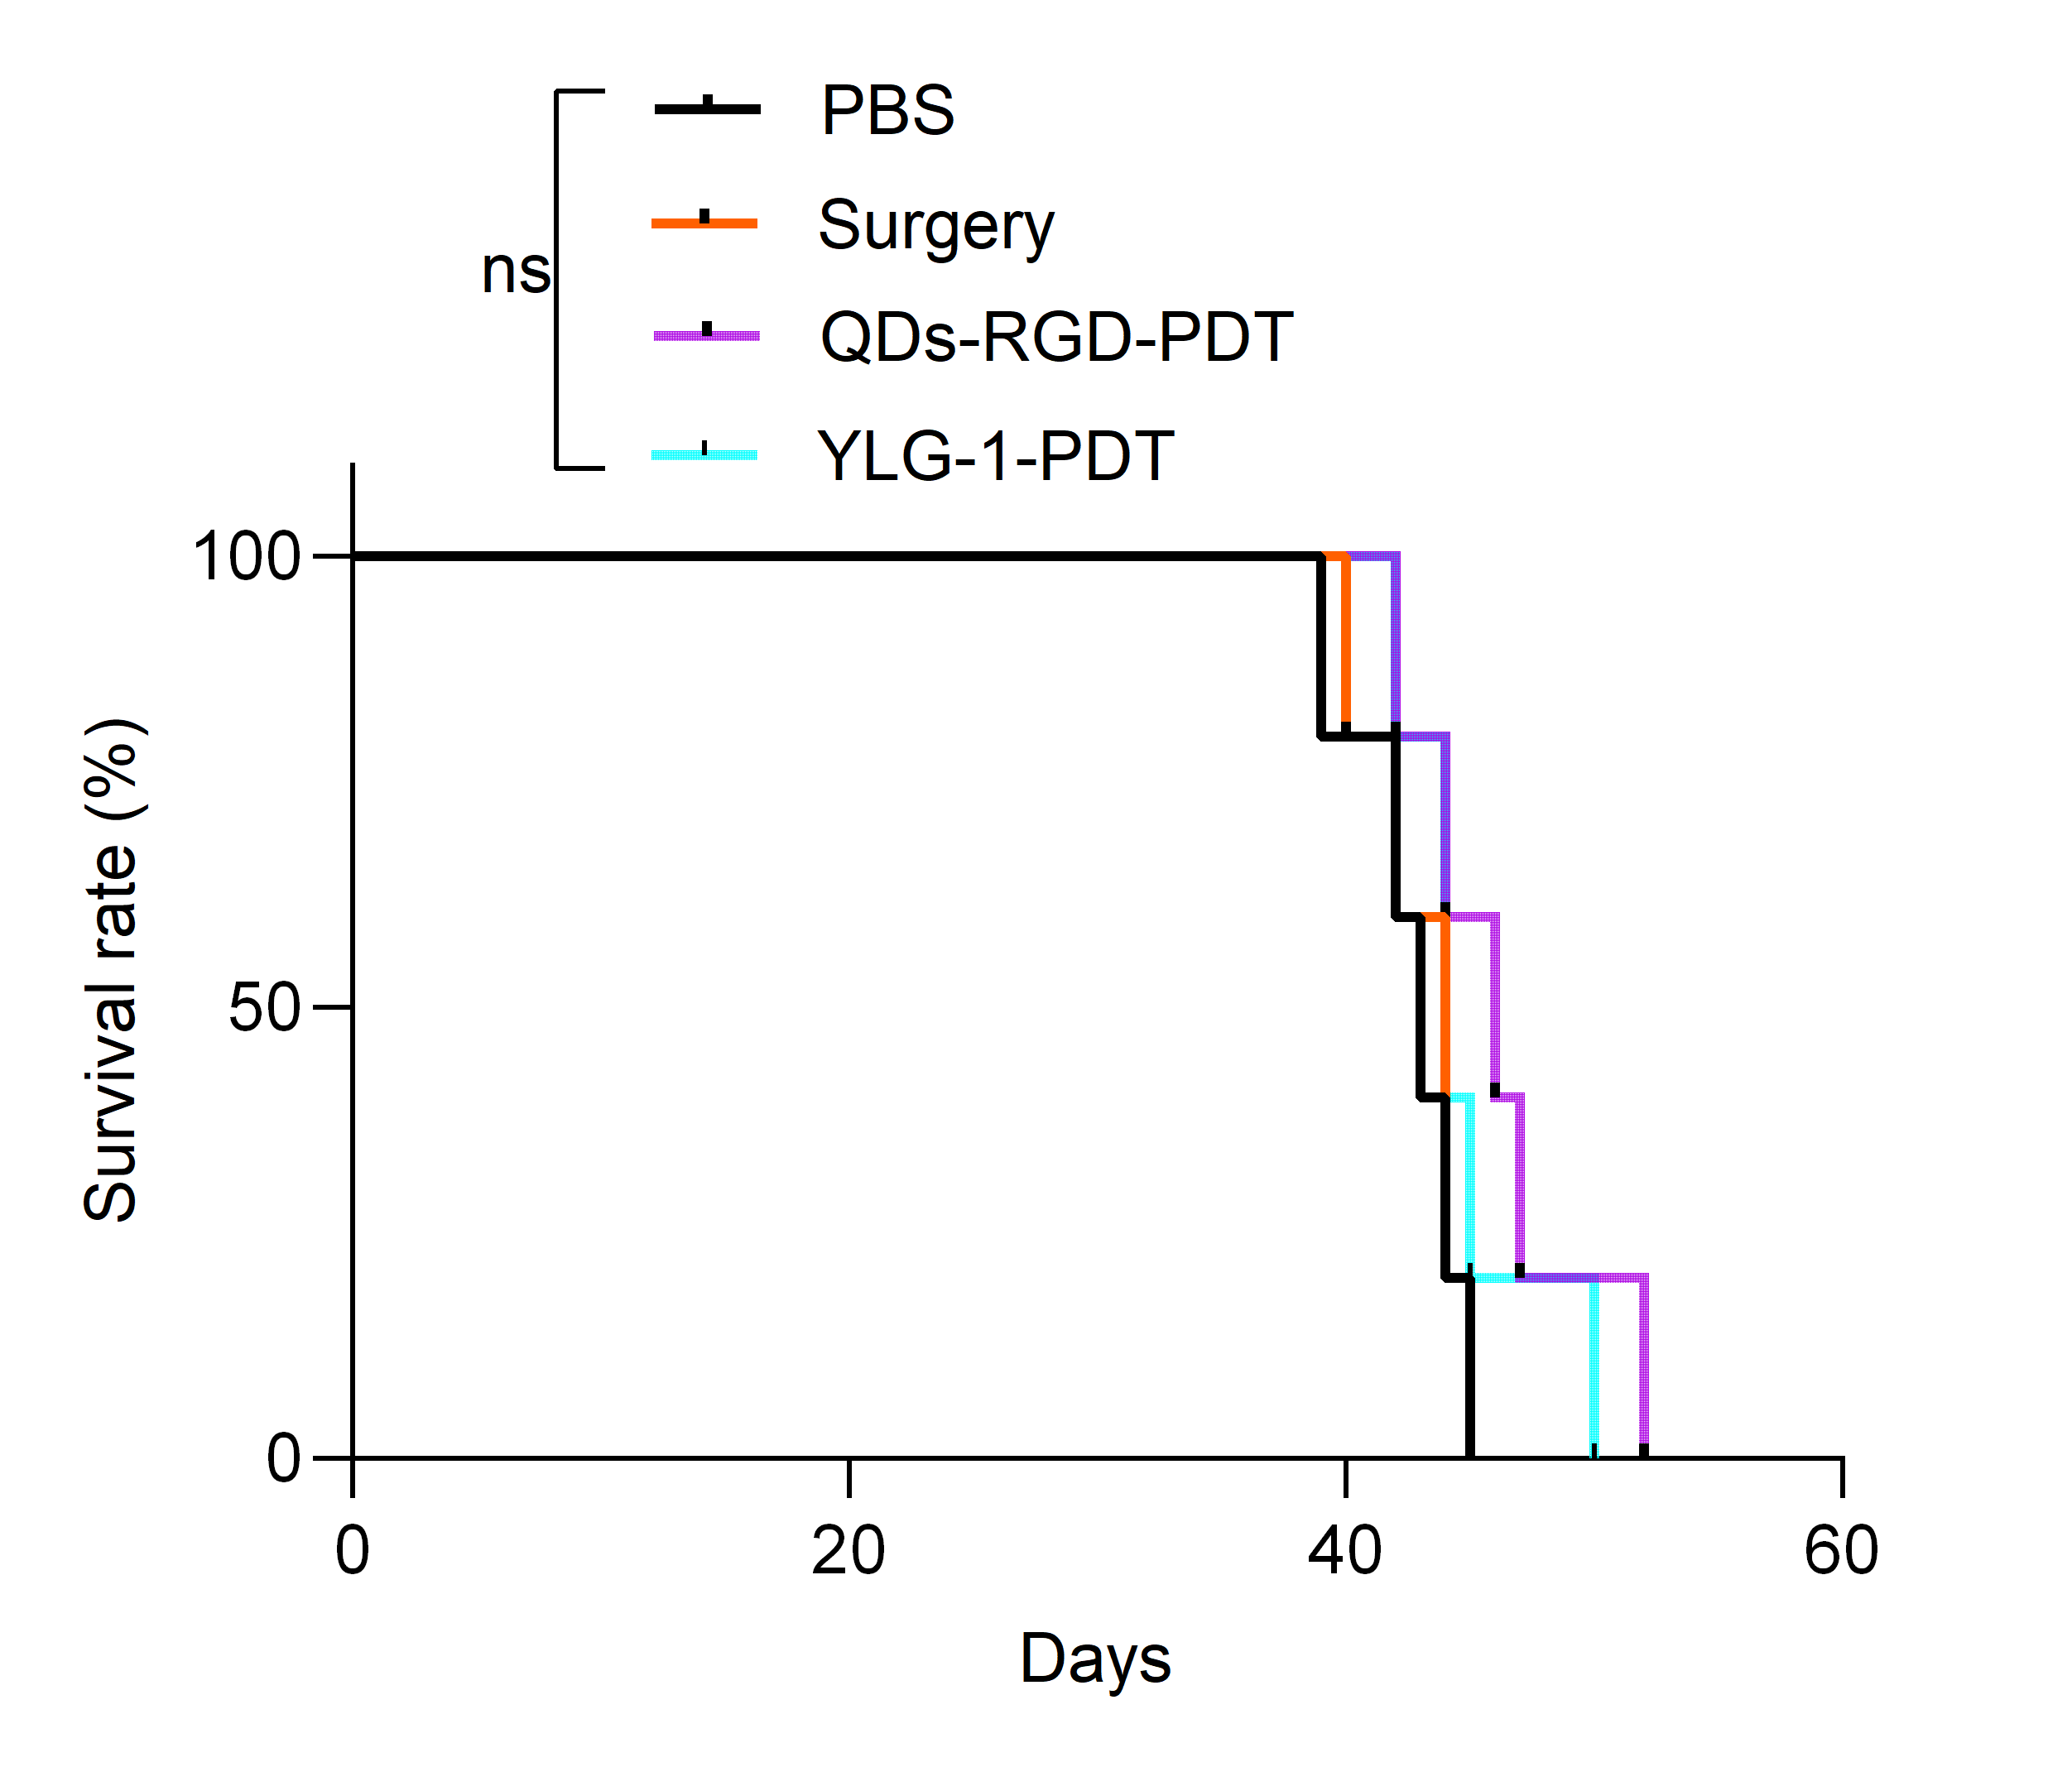


Notes: Survival rate on mice after various treatments indicated (n = 5). ns, not significant.

Abbreviations: QDs-RGD, quantum dots conjugated with arginine-glycine-aspartic acid peptide sequence; YLG-1, (17R,18R)-2-(1-hexyloxyethyl)-2-devinyl chlorine E6 trisodium salt; PBS, phosphate-buffered saline; PDT, photodynamic therapy.

Figure S4 Survival rate on mice after various treatments indicated.


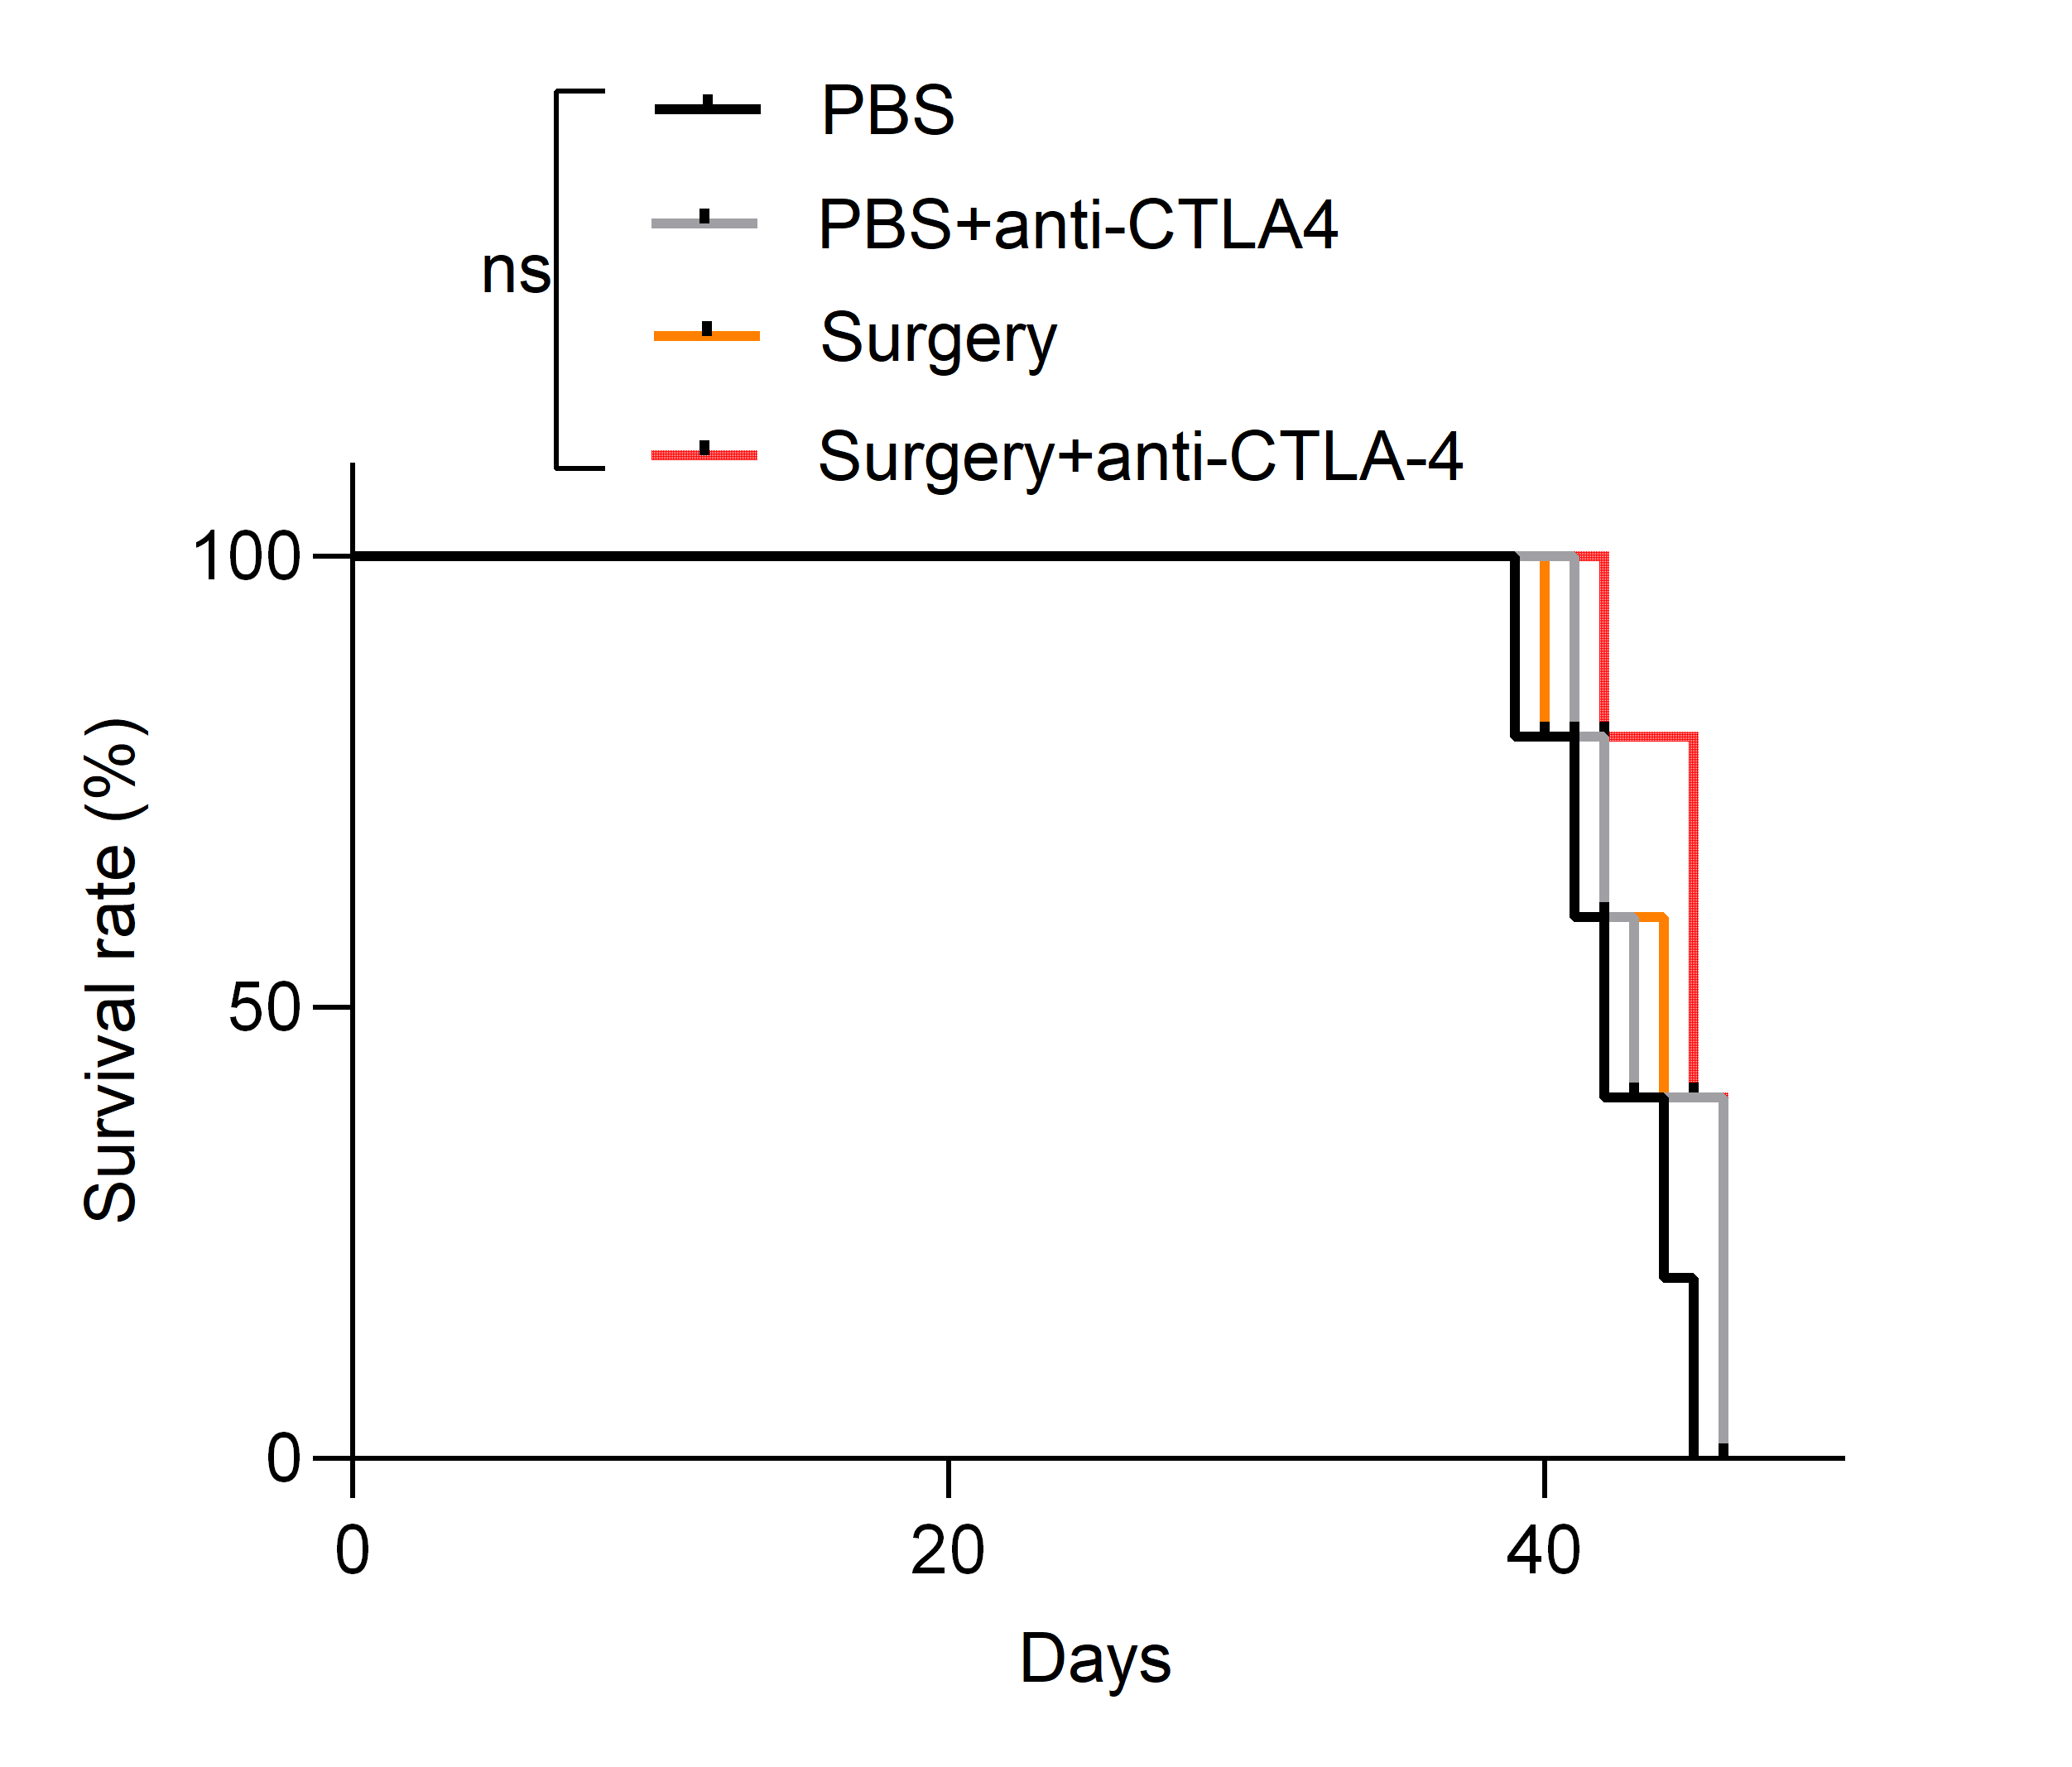


Notes: Survival rate on mice after various treatments indicated (n = 5). ns, not significant.

Abbreviations: PBS, phosphate-buffered saline; CTLA-4, cytotoxic T lymphocyte-associated antigen-4.

Figure S5 Survival rate on mice after various treatments indicated.


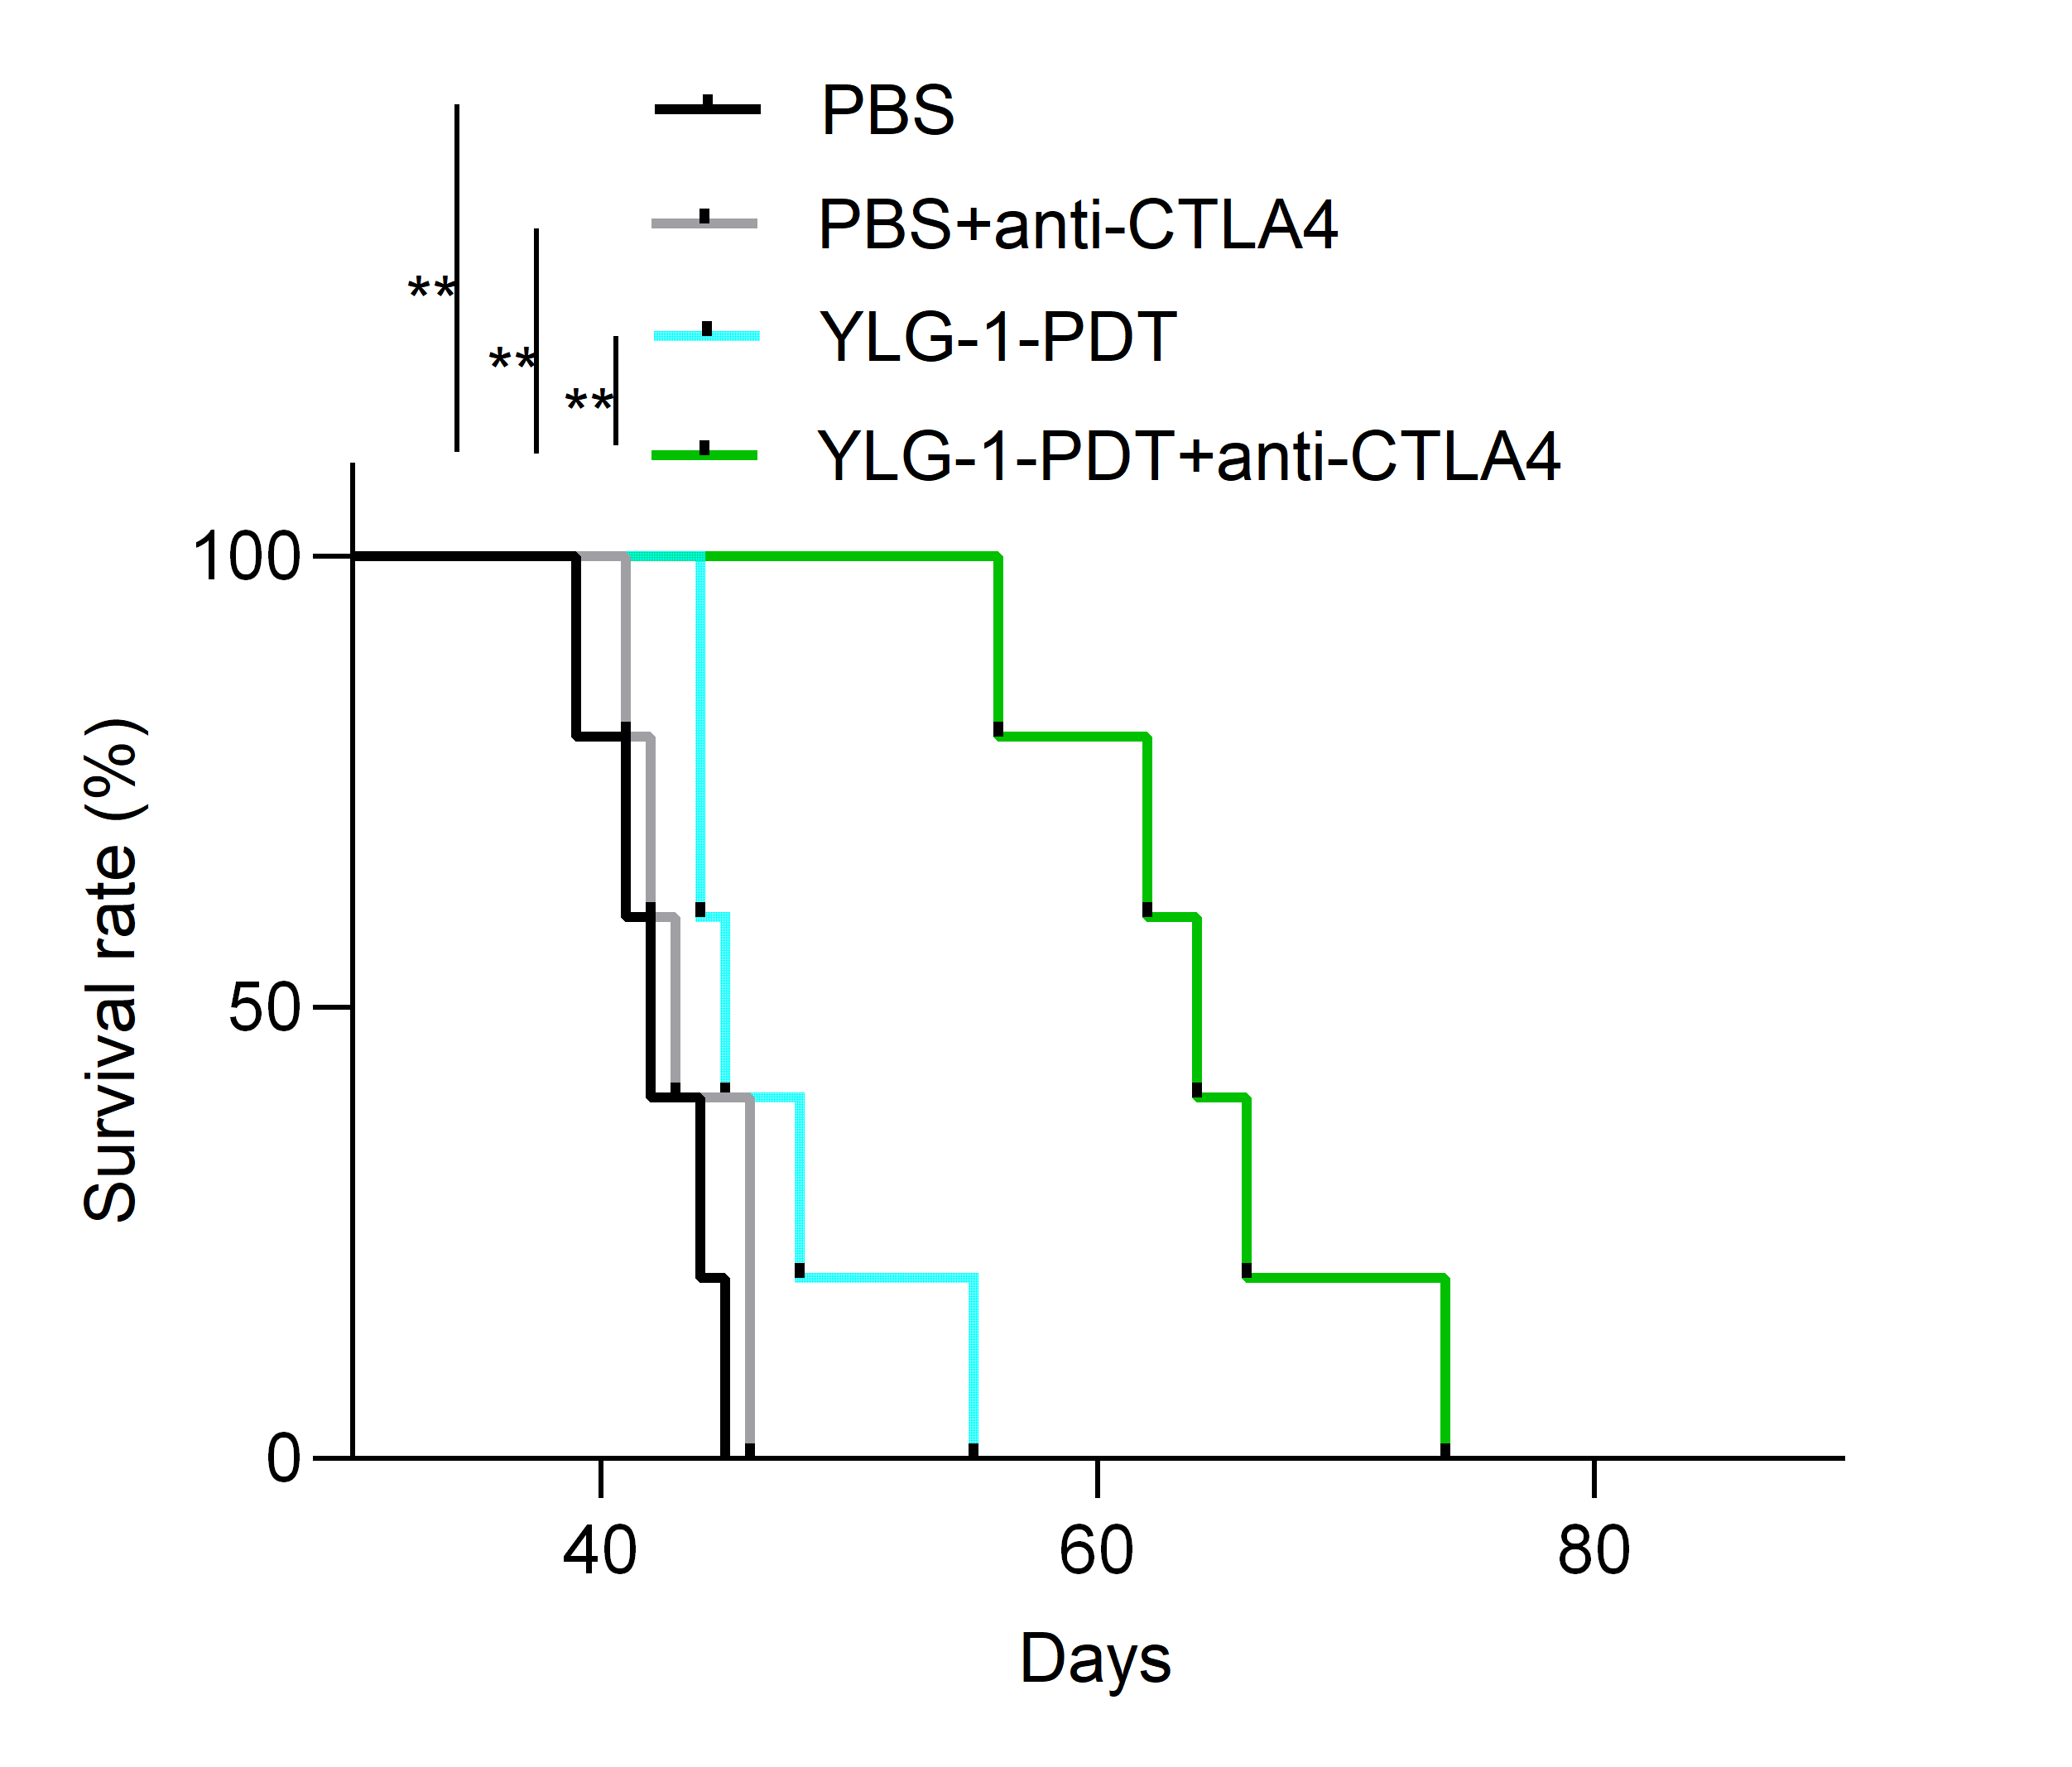


Notes: Survival rate on mice after various treatments indicated (n = 5). ***P* < 0.01.

Abbreviations: YLG-1, (17R,18R)-2-(1-hexyloxyethyl)-2-devinyl chlorine E6 trisodium salt; PBS, phosphate-buffered saline; PDT, photodynamic therapy; CTLA-4, cytotoxic T lymphocyte-associated antigen-4.
